# Supplementary material for: Effect of carboxylated poly(ethylene oxide-b-propylene oxide-b-ethylene oxide) block copolymer on nanostructured unsaturated polyester resin
Source: Royal Society of Chemistry journal article supplement (doi:10.1039/c5ra18290e), 2015-01-01

S1. Scheme of carboxylation of EPE using SA.

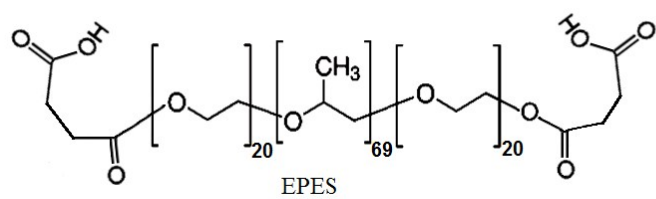

S2. <sup>1</sup>H NMR chemical shifts of EPE, EPES and EPEM in CDCl<sub>3</sub> at 25 °C.

| Proton                                     | δ (ppm)       |
|--------------------------------------------|---------------|
| -CH <sub>2</sub> O-                        | 3.70 - 3.74   |
| -CH <sub>2</sub> CH <sub>2</sub> -OH       | 3.64 - 3.58   |
| -CH <sub>2</sub> CH <sub>2</sub> -O-       | 3.64 - 3.66   |
| -O-CH <sub>H</sub> CH(CH <sub>3</sub> )-O- | 3.43 - 3.36   |
| -O-CH <sub>H</sub> CH(CH <sub>3</sub> )-O- | 3.58 - 3.50   |
| -O-CHCH(CH <sub>3</sub> )-O-               | 1.143 - 1.135 |
| -OH                                        | 2.45 - 2.42   |
| -CH=CH-                                    | 6.22 - 6.35   |
| -CH <sub>2</sub> CH <sub>2</sub> -COOH     | 2.55          |

S3.  $^{13}\text{C}$  NMR spectra (125 MHz,  $\text{CDCl}_3$ ,  $\delta/\text{ppm}$ ) of (a) EPE: 63.7 (a,  $-\text{CH}_2-\text{OH}$ ), 72.5 (b,  $-\text{CH}_2-\text{CH}_2-\text{O}-$ ), 18.8 (c,  $-\text{CH}_3$ ), 76.9 (d,  $-\text{O}-\text{CH}-$ ), 75.0 (e,  $-\text{O}-\text{CH}_2-$ ); (b) EPES: 173.8 and 175.0 (a,  $-\text{COO}-$ ) 30.4 and 30.9 (b,  $-\text{CH}-\text{CH}-$ ); (c) EPEM: 167.5 and 168.1 (a,  $-\text{COO}-$ ), 130.6 and 133.1 (b,  $-\text{CH}=\text{CH}-$ ).

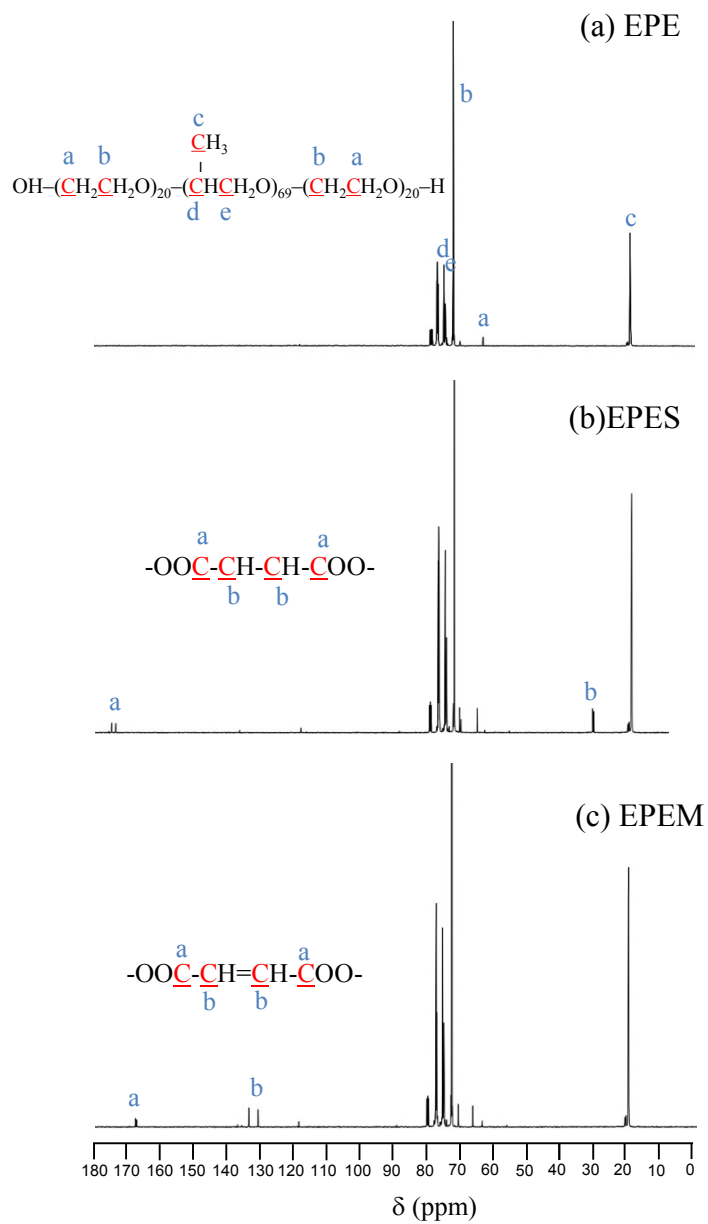

Supplement: c5ra18290e1.pdf [file c5ra18290e1.pdf]
